# Supplementary material
Source: ML conference proceedings conference paper supplement (https://proceedings.mlr.press/v164/dawson22a.html)
Supplement: Supplementary file 2 [file dawson22a-supp.zip]

Archive with 2 entries (1 files):
- supplementary_materials/
- supplementary_materials/286_appendix.pdf
